# Supplementary material
Source: publisher site journal article supplement (https://www.spandidos-publications.com/3654/downloadSupplementary)
Supplement: Supplementary file 1 [file downloadSupplementary]

## Sheet: Sheet1
Table SVII. Raw data of PRDX2 determined by ELISA.
No.	Well No.	Sample No.	Absorbance	Calibrated OD Value	Quantitative Value (Dilution ratio 1:100)	Final Concentration, ng/ml	Item Name
1	A2	S7	2.3452	2.2045	N/A	N/A	PRDX2
2	B2	S7	2.2769	2.1362	N/A	N/A	PRDX2
3	C2	S6	1.7936	1.6529	N/A	N/A	PRDX2
4	D2	S6	1.7458	1.6051	N/A	N/A	PRDX2
5	E2	S5	1.0841	0.9434	N/A	N/A	PRDX2
6	F2	S5	1.109	0.9683	N/A	N/A	PRDX2
7	G2	S4	0.7168	0.5761	N/A	N/A	PRDX2
8	H2	S4	0.6878	0.5471	N/A	N/A	PRDX2
9	A3	S3	0.4552	0.3145	N/A	N/A	PRDX2
10	B3	S3	0.4026	0.2619	N/A	N/A	PRDX2
11	C3	S2	0.3327	0.192	N/A	N/A	PRDX2
12	D3	S2	0.338	0.1973	N/A	N/A	PRDX2
13	E3	S1	0.1896	0.0489	N/A	N/A	PRDX2
14	F3	S1	0.1754	0.0347	N/A	N/A	PRDX2
15	G3	S0	0.1448	0.0041	N/A	N/A	PRDX2
16	H3	S0	0.1366	-0.0041	N/A	N/A	PRDX2
17	A4	1-1	1.34037	1.19967	72.1976	7219.76	PRDX2
18	B4	1-1	1.43199	1.29129	80.8484	8084.84	PRDX2
19	C4	1-2	2.42376	2.28306	265.975	26597.5	PRDX2
20	D4	1-2	2.49141	2.35071	286.664	28666.4	PRDX2
21	E4	2-1	2.01349	1.87279	165.266	16526.6	PRDX2
22	F4	2-1	2.05614	1.91544	173.916	17391.6	PRDX2
23	G4	2-2	2.52777	2.38707	298.31	29831	PRDX2
24	H4	2-2	2.58967	2.44897	318.998	31899.8	PRDX2
25	A5	3-1	2.13243	1.99173	190.38	19038	PRDX2
26	B5	3-1	2.17026	2.02956	199.03	19903	PRDX2
27	C5	3-2	2.17026	2.02956	199.03	19903	PRDX2
28	D5	3-2	2.70991	2.56921	362.421	36242.1	PRDX2
29	E5	4-1	1.84529	1.70459	134.772	13477.2	PRDX2
30	F5	4-1	1.79121	1.65051	126.121	12612.1	PRDX2
31	G5	4-2	2.00055	1.85985	162.717	16271.7	PRDX2
32	H5	4-2	2.10084	1.96014	183.406	18340.6	PRDX2
33	A6	5-1	1.96841	1.82771	156.537	15653.7	PRDX2
34	B6	5-1	1.93523	1.79453	150.378	15037.8	PRDX2
35	C6	5-2	1.89826	1.75756	143.775	14377.5	PRDX2
36	D6	5-2	2.00944	1.86874	164.463	16446.3	PRDX2
37	E6	6-1	2.35707	2.21637	246.784	24678.4	PRDX2
38	F6	6-1	2.32561	2.18491	238.133	23813.3	PRDX2
39	G6	6-2	2.60287	2.46217	323.555	32355.5	PRDX2
40	H6	6-2	2.54169	2.40099	302.867	30286.7	PRDX2
41	A7	7-1	1.44588	1.30518	82.2509	8225.09	PRDX2
42	B7	7-1	1.35598	1.21528	73.6001	7360.01	PRDX2
43	C7	7-2	2.04558	1.90488	171.738	17173.8	PRDX2
44	D7	7-2	2.1519	2.0112	194.791	19479.1	PRDX2
45	E7	8-1	1.64715	1.50645	105.566	10556.6	PRDX2
46	F7	8-1	1.59865	1.45795	99.4063	9940.63	PRDX2
47	G7	8-2	2.22851	2.08781	213.007	21300.7	PRDX2
48	H7	8-2	2.31793	2.17723	236.061	23606.1	PRDX2
49	A8	9-1	2.40383	2.26313	260.115	26011.5	PRDX2
50	B8	9-1	2.38247	2.24177	253.956	25395.6	PRDX2
51	C8	9-2	2.53599	2.39529	300.992	30099.2	PRDX2
52	D8	9-2	2.60428	2.46358	324.042	32404.2	PRDX2
53	E8	10-1	2.327	2.1863	238.51	23851	PRDX2
54	F8	10-1	2.3673	2.2266	249.652	24965.2	PRDX2
55	G8	10-2	2.16451	2.02381	197.695	19769.5	PRDX2
56	H8	10-2	2.25941	2.11871	220.749	22074.9	PRDX2
57	A9	11-1	2.37166	2.23096	250.882	25088.2	PRDX2
58	B9	11-1	2.41036	2.26966	262.024	26202.4	PRDX2
59	C9	11-2	2.3178	2.1771	236.025	23602.5	PRDX2
60	D9	11-2	2.40026	2.25956	259.078	25907.8	PRDX2
61	E9	12-1	1.548	1.4073	93.3517	9335.17	PRDX2
62	F9	12-1	1.49297	1.35227	87.1923	8719.23	PRDX2
63	G9	12-2	1.97877	1.83807	158.506	15850.6	PRDX2
64	H9	12-2	2.08126	1.94056	179.194	17919.4	PRDX2
65	A10	13-1	2.2432	2.1025	216.659	21665.9	PRDX2
66	B10	13-1	2.20806	2.06736	208.009	20800.9	PRDX2
67	C10	13-2	2.51855	2.37785	295.319	29531.9	PRDX2
68	D10	13-2	2.45256	2.31186	274.631	27463.1	PRDX2
69	E10	14-1	2.35782	2.21712	246.993	24699.3	PRDX2
70	F10	14-1	2.32638	2.18568	238.343	23834.3	PRDX2
71	G10	14-2	2.69499	2.55429	356.794	35679.4	PRDX2
72	H10	14-2	2.63186	2.49116	333.741	33374.1	PRDX2
73	A11	15-1	1.60467	1.46397	100.151	10015.1	PRDX2
74	B11	15-1	1.53185	1.39115	91.5001	9150.01	PRDX2
75	C11	15-2	2.75068	2.60998	378.147	37814.7	PRDX2
76	D11	15-2	2.69676	2.55606	357.46	35746	PRDX2
77	E11	16-1	2.50811	2.36741	291.965	29196.5	PRDX2
78	F11	16-1	2.48073	2.34003	283.314	28331.4	PRDX2
79	G11	16-2	2.689	2.5483	354.557	35455.7	PRDX2
80	H11	16-2	2.63222	2.49152	333.868	33386.8	PRDX2
81	A12	17-1	2.14601	2.00531	193.447	19344.7	PRDX2
82	B12	17-1	2.10722	1.96652	184.797	18479.7	PRDX2
83	C12	17-2	2.3213	2.1806	236.967	23696.7	PRDX2
84	D12	17-2	2.24168	2.10098	216.279	21627.9	PRDX2
PRDX2, peroxiredoxin-2; N/A, not applicable.
